# Supplementary material for: MED13L integrates Mediator-regulated epigenetic control into lung cancer radiosensitivity
Source: PubMed Central journal article supplement (PMC7415817; doi:10.7150/thno.48247), 2020-07-23

**Supplementary Table 1.** qPCR primers used in the study

| <b>Genes</b>  | <b>Primers</b> | <b>Sequences (5'- 3')</b> |
|---------------|----------------|---------------------------|
| <i>MED13L</i> | Forward        | AAATGGGACGCTAACAGG        |
|               | Reverse        | CCGAACACCACCAACAAT        |
| <i>SHOX</i>   | Forward        | GAGACCCATTACCCCGACG       |
|               | Reverse        | ATTCTCTTGTTTGCGGCACTT     |
| <i>PRKCA</i>  | Forward        | GTCCACAAGAGGTGCCATGAA     |
|               | Reverse        | AAGGTGGGGCTTCCGTAAGT      |
| <i>PAK4</i>   | Forward        | GGACATCAAGAGCGACTCGAT     |
|               | Reverse        | CGACCAGCGACTTCCTTCG       |
| <i>ARAF</i>   | Forward        | CCTGGCGTTCTGTGACTTCTG     |
|               | Reverse        | CGGTTGGTACTCATGTCAACAC    |
| <i>SOS2</i>   | Forward        | ATGTAGAGGAGCGAGTTCAGAA    |
|               | Reverse        | ATGGTAGTCCACTTTGTACCCT    |
| <i>AKT3</i>   | Forward        | AATGGACAGAAGCTATCCAGGC    |
|               | Reverse        | TGATGGGTTGTAGAGGCATCC     |
| <i>ACTIN</i>  | Forward        | GGCGGCACCACCATGTACCCT     |
|               | Reverse        | AGGGGCCGGACTCGTCATACT     |

**Supplementary Table 2.** Demographic and clinical characteristics of stage III NSCLC patients from Jiangsu cohort

| <b>Parameter</b> | <b>Number of patients</b> |
|------------------|---------------------------|
| Age (years)      | 70.1 (49.5-89.2)          |
| Gender           |                           |
| Male             | 65(60.2%)                 |
| Female           | 43 (39.8%)                |
| Stage            |                           |
| IIIA             | 51 (47.2%)                |
| IIIB             | 57 (52.8%)                |
| Histology        |                           |
| Adeno            | 57 (52.8%)                |
| SCC              | 48 (44.4%)                |
| NSCLC-NOS        | 3 (2.8%)                  |
| KPS Score        | 80 (60-100)               |
| PFS (months)     |                           |
| Median           | 12.5                      |
| Event            | 75 (69.4%)                |
| No event         | 33 (30.6%)                |
| OS (months)      |                           |
| Median           | 19.1                      |
| Event            | 59 (54.6%)                |
| No event         | 49 (45.4%)                |

Note: NSCLC: non-small cell lung cancer; Adeno: adenocarcinoma; SCC: squamous cell carcinoma; NSCLC-NOS: NSCLC not otherwise specified; KPS: Karnofsky performance status; PFS: progression-free survival; OS: overall survival.

**Supplementary Table 3.** RNA oligos used in the study

| <b>RNA oligos</b>     | <b>Sequences (5'- 3')</b>                    |
|-----------------------|----------------------------------------------|
| miR-4497 mimics       | CUCCGGGACGGCUGGGC                            |
| miR-4497 inhibitors   | GCCCAGCCGUCCCGGAG                            |
| <i>MED13L</i> siRNA-1 | GCCAAAGACUGCCUCUCAUTT/ AUGAGAGGCAGUCUUUGGCTT |
| <i>MED13L</i> siRNA-2 | GCACAAGCCCAUCUGCAAATT/ UUUGCAGAUGGGCUUGUGCTT |

**Supplementary Table 4.** Primers for *MED13L* 3'-UTR reporter gene constructs

| <b>Primers</b>       | <b>Sequences (5'-3')</b>                  |
|----------------------|-------------------------------------------|
| MED13L-3'-UTR-F      | CCGCTCGAGGTACCACCAGTTGAAGGG (XhoI)        |
| MED13L-3'-UTR-R      | CTAGAAGCTTATTGGGTTTCTAGGGAAG (HindIII)    |
| Mutagenesis 3'-UTR-F | CTTTGGGGTTGCTTTTTTCCCGGAATTCATCAGAACTTTGA |
| Mutagenesis 3'-UTR-R | TCAAAGTTCTGATGAATTCCGGGAAAAAAGCAACCCCAAAG |

**Supplementary Table 5.** P300 ChIP-qPCR primers in regions around *PRKCA*

| <b>Gene region</b>    | <b>Primers</b> | <b>Sequences (5' - 3')</b> |
|-----------------------|----------------|----------------------------|
| <i>PRKCA</i> region 1 | Forward        | ACCTGGAAGCCTTGGAAC         |
|                       | Reverse        | AACTGCCGAAATGCGTAA         |
| <i>PRKCA</i> region2  | Forward        | GGCGGCAAGAGCGGAAGAA        |
|                       | Reverse        | GTGCTGGGAACACTGGGCAAGG     |
| <i>PRKCA</i> region 3 | Forward        | GGCAGGCGGATCACCTAA         |
|                       | Reverse        | CGGAATCTCGCTCTGTCTCAC      |
| <i>PRKCA</i> region 4 | Forward        | GGGTATAGGGTGAGAAAGT        |
|                       | Reverse        | CTGGAGCATGATGATTGA         |
| <i>PRKCA</i> region 5 | Forward        | ACTTCACCCACATGACTGT        |
|                       | Reverse        | ATCACCTCCTGCTTTCT          |
| <i>PRKCA</i> region 6 | Forward        | GGTGAGATTACTGGGCTAC        |
|                       | Reverse        | GGTGTCTGGGAAGATAAAA        |

# Supplementary Figure 1

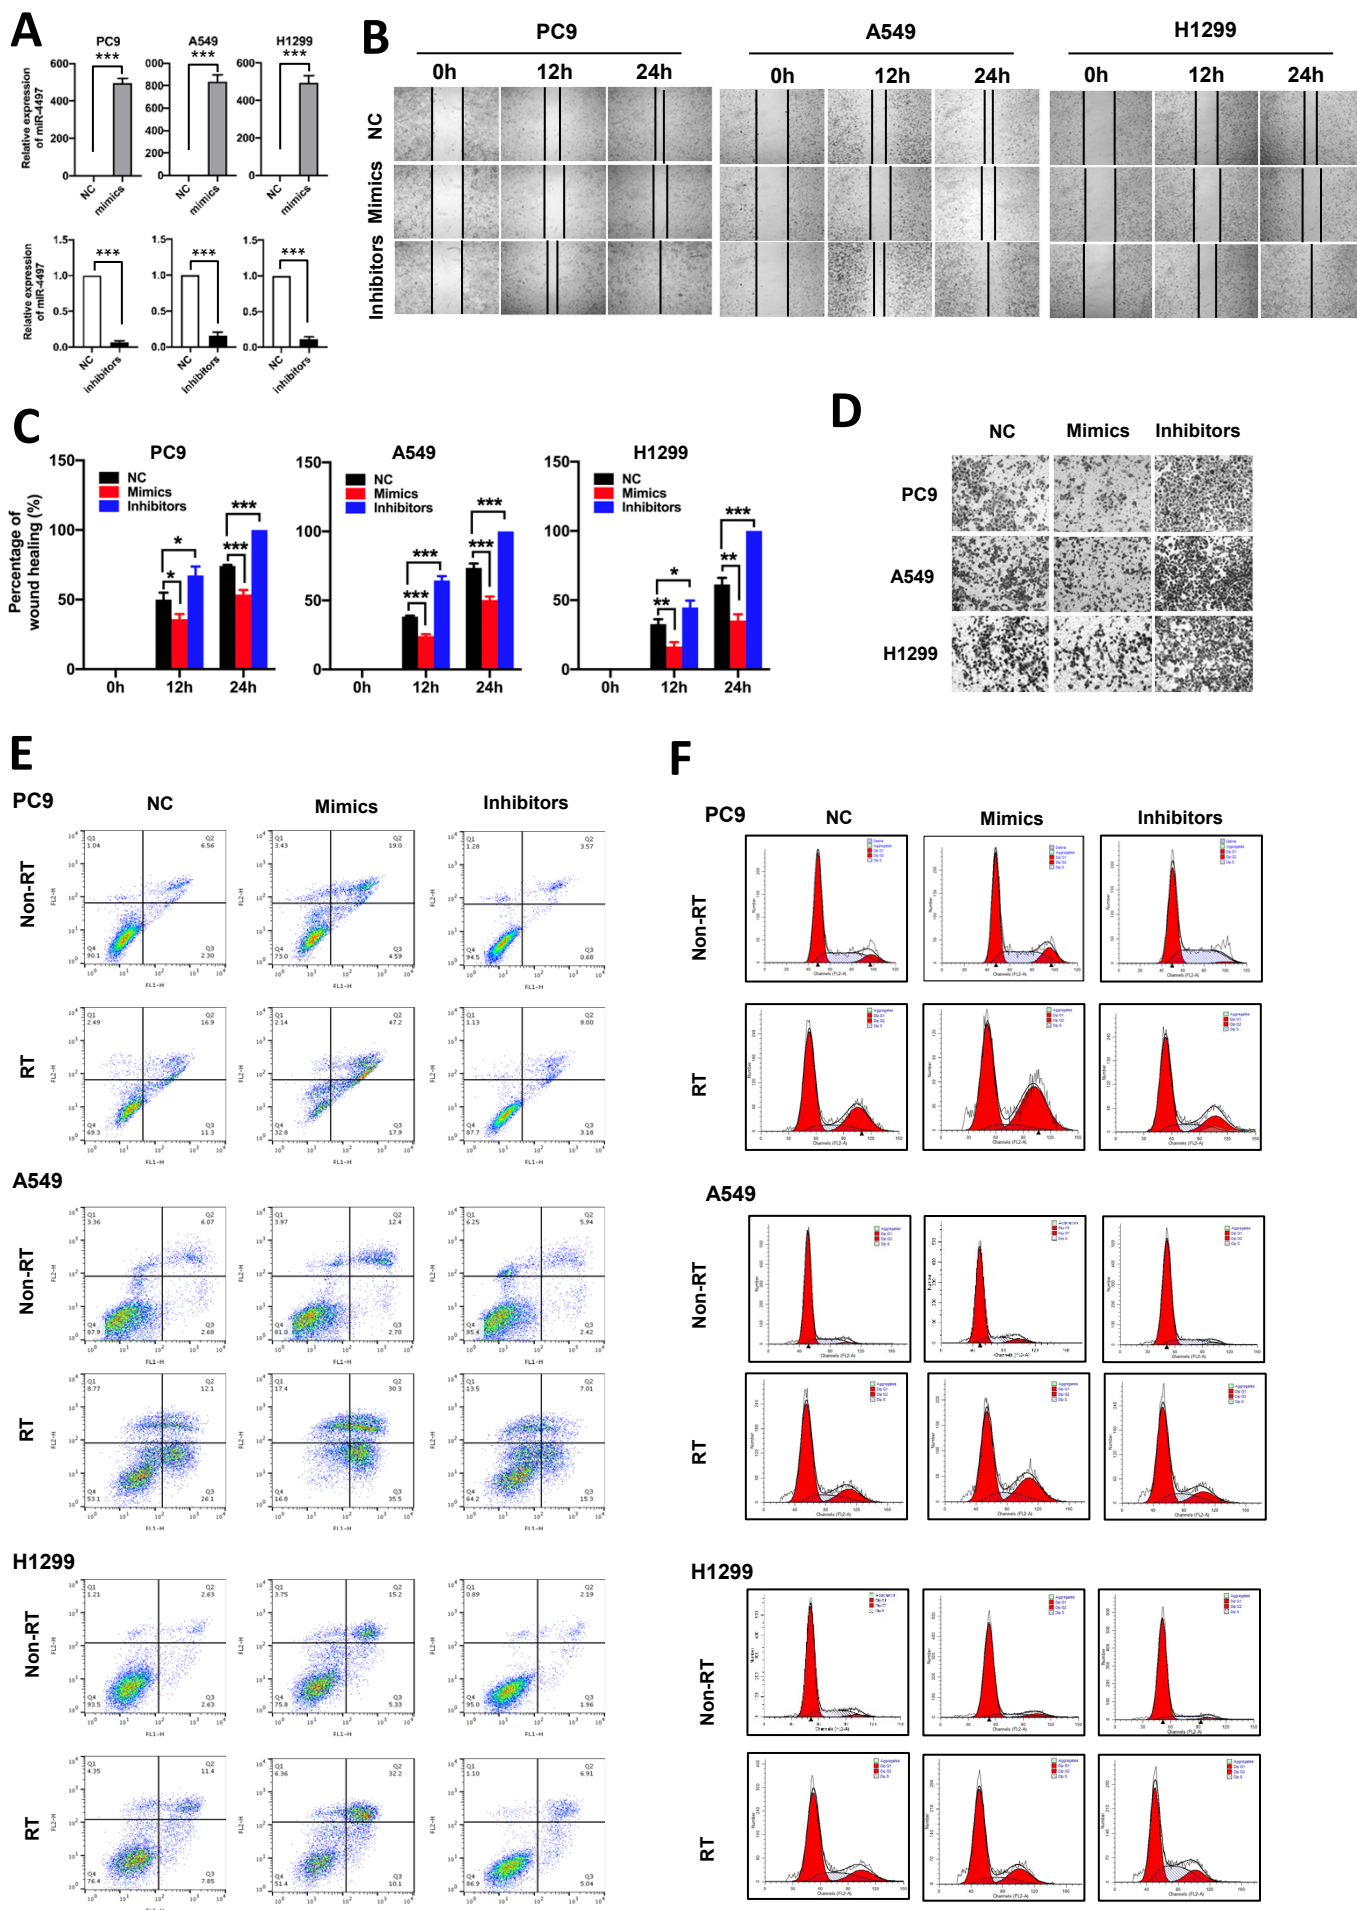

# Supplementary Figure 2

**A**

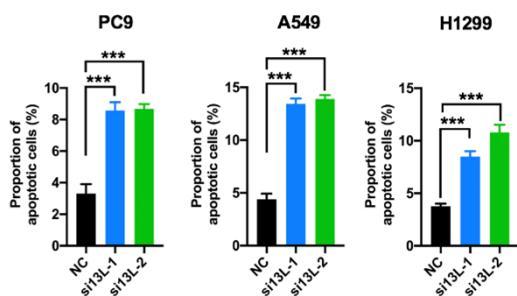

**B**

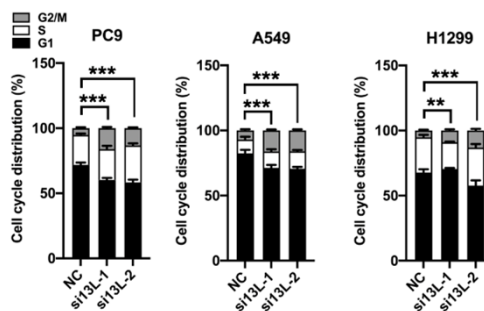

**C**

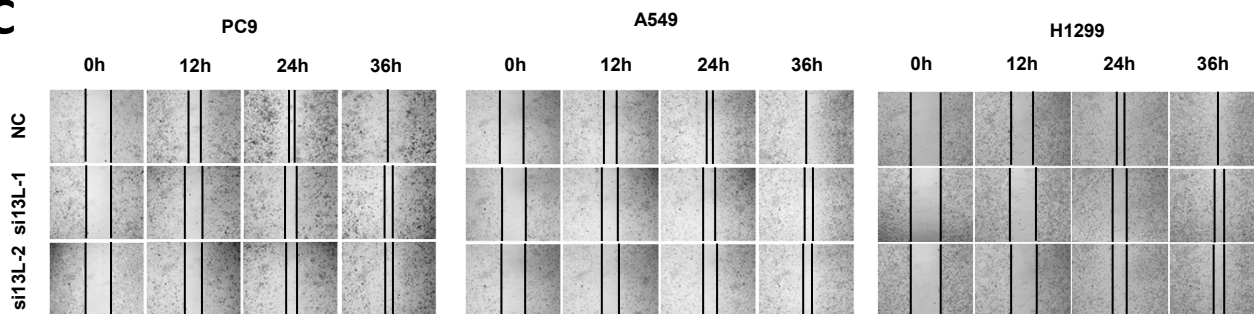

**D**

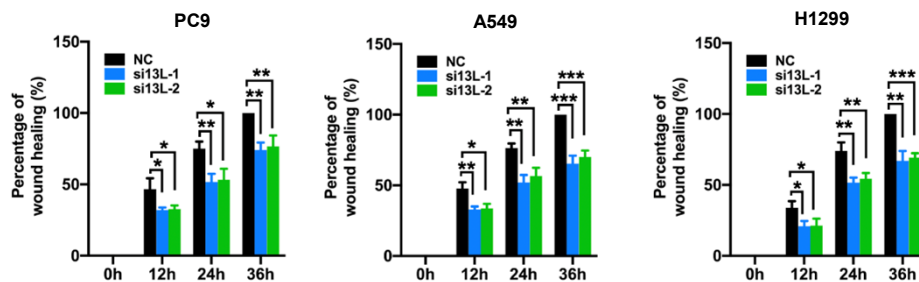

**E**

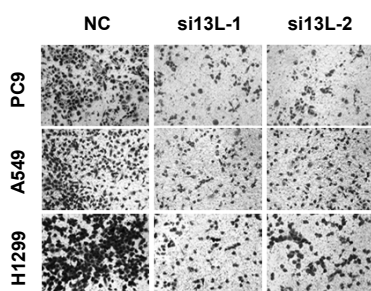

**F**

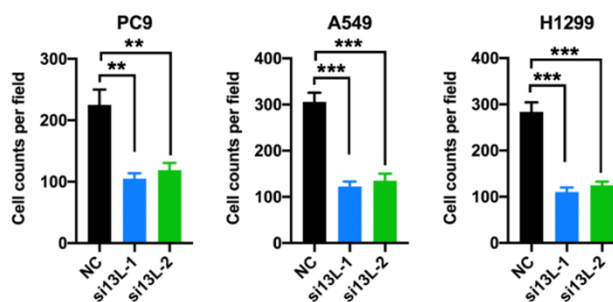

# Supplementary Figure 3

**A**

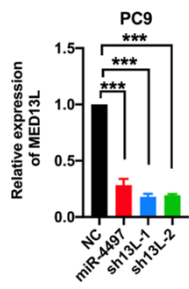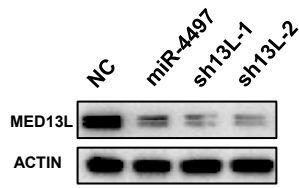

**B**

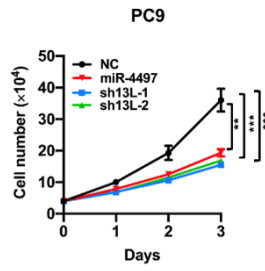

**C**

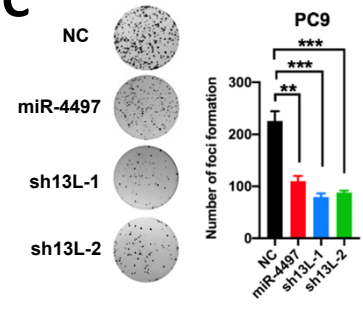



# Supplementary Figure 4

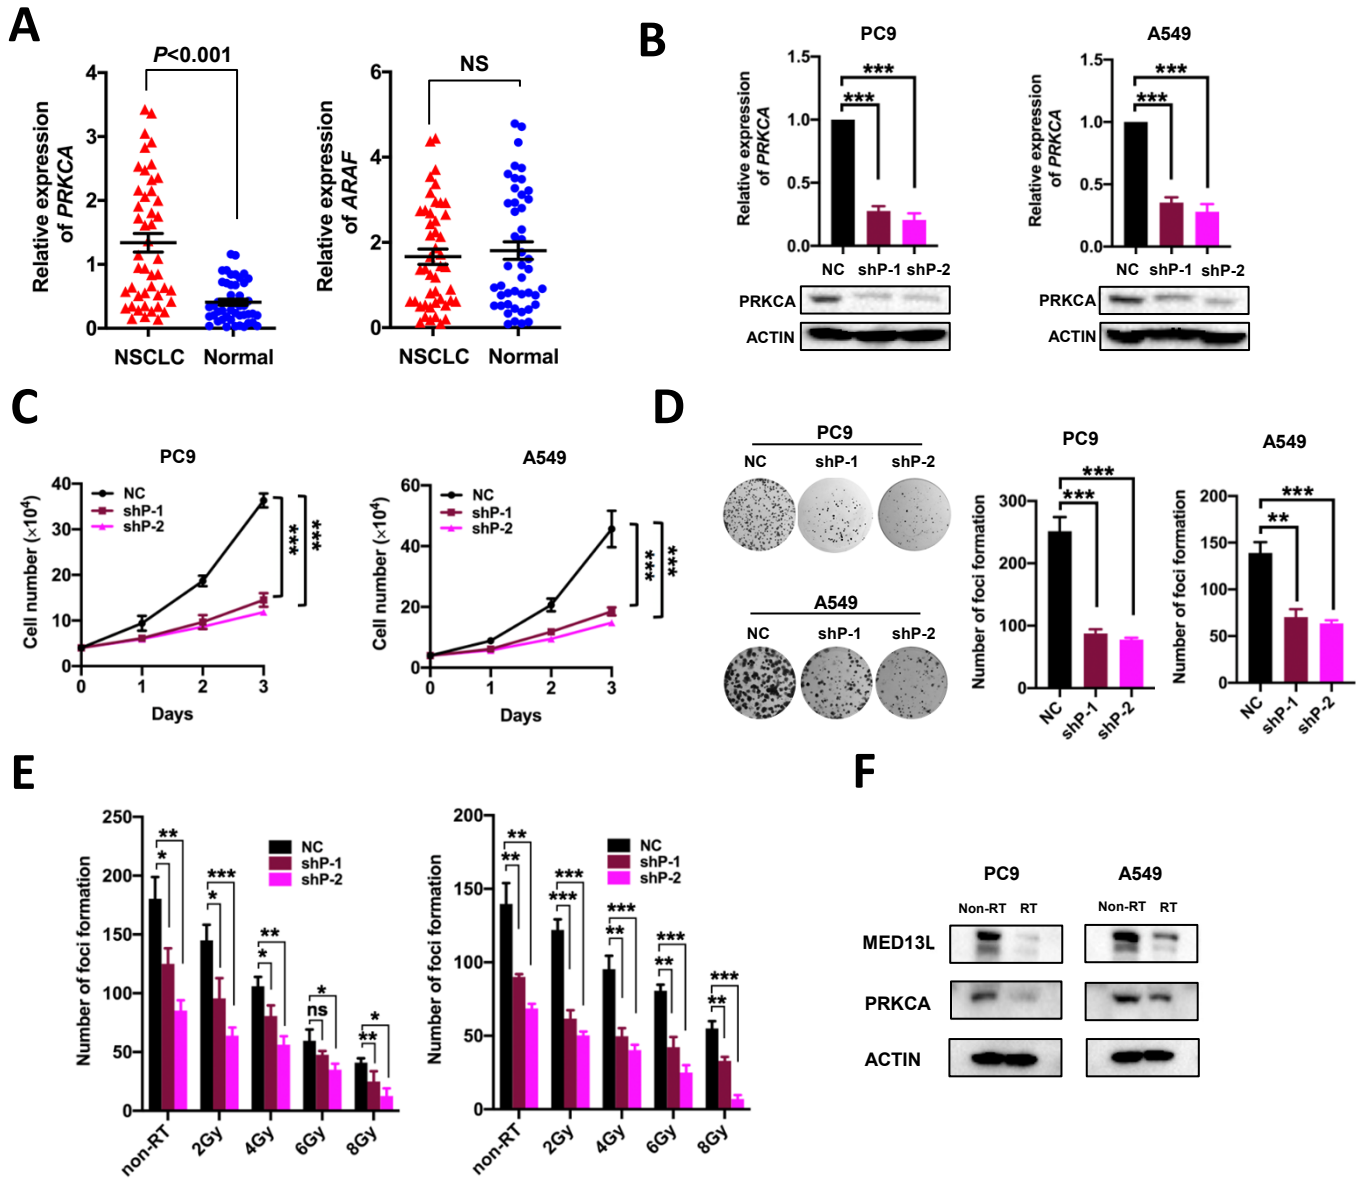

Supplement: thnov10p9378s1.pdf [file thnov10p9378s1.pdf]
